# Supplementary material
Source: MDPI journal article supplement (https://www.mdpi.com/search?q=molbank-2021-M1274)
Supplement: s002 [file molbank-2021-M1274-s002-mod.mol]

Structure 1.mol
  corina  09102111543D 1   1.00000     0.00000 
CORINA 4.3.0 0026  30.10.2019
 61 63  0  0  0  0  0  0  0  0999 V2000
   -1.2516    3.0374    0.0302 C   0  0  0  0  0  0  0  0  0  0  0  0
   -2.4574    3.7108    0.0342 C   0  0  0  0  0  0  0  0  0  0  0  0
   -3.6488    3.0007    0.0356 C   0  0  0  0  0  0  0  0  0  0  0  0
   -3.6305    1.6138    0.0280 C   0  0  0  0  0  0  0  0  0  0  0  0
   -2.4256    0.9388    0.0187 C   0  0  0  0  0  0  0  0  0  0  0  0
   -1.2323    1.6490    0.0169 C   0  0  0  0  0  0  0  0  0  0  0  0
   -0.0111    0.9658    0.0074 N   0  0  0  0  0  0  0  0  0  0  0  0
   -4.8357    3.6646    0.0448 O   0  0  0  0  0  0  0  0  0  0  0  0
   -4.7803    5.0925    0.0522 C   0  0  0  0  0  0  0  0  0  0  0  0
    8.3305   12.9422    5.1968 C   0  0  0  0  0  0  0  0  0  0  0  0
    7.1323   12.2315    5.1881 C   0  0  0  0  0  0  0  0  0  0  0  0
    5.9154   12.9097    5.1822 C   0  0  0  0  0  0  0  0  0  0  0  0
    5.8924   14.2749    5.1954 C   0  0  0  0  0  0  0  0  0  0  0  0
    7.0950   14.9937    5.2041 C   0  0  0  0  0  0  0  0  0  0  0  0
    8.3166   14.3076    5.2047 C   0  0  0  0  0  0  0  0  0  0  0  0
    4.9889   12.3549    5.1709 H   0  0  0  0  0  0  0  0  0  0  0  0
    7.0752   16.4611    5.2121 C   0  0  0  0  0  0  0  0  0  0  0  0
    6.0165   17.0534    5.2115 O   0  0  0  0  0  0  0  0  0  0  0  0
    7.1511   10.8427    5.1797 N   0  0  0  0  0  0  0  0  0  0  0  0
    8.4236   10.1281    5.0522 C   0  0  0  0  0  0  0  0  0  0  0  0
    5.8983   10.0925    5.2982 C   0  0  0  0  0  0  0  0  0  0  0  0
   15.9869   24.7540   12.0170 C   0  0  0  0  0  0  0  0  0  0  0  0
   16.8413   24.0804   11.1540 C   0  0  0  0  0  0  0  0  0  0  0  0
   17.6725   24.7912   10.2982 C   0  0  0  0  0  0  0  0  0  0  0  0
   17.6528   26.1694   10.3020 C   0  0  0  0  0  0  0  0  0  0  0  0
   16.7950   26.8512   11.1685 C   0  0  0  0  0  0  0  0  0  0  0  0
   15.9647   26.1322   12.0317 C   0  0  0  0  0  0  0  0  0  0  0  0
   15.6322   28.8524   11.1899 C   0  0  0  0  0  0  0  0  0  0  0  0
   16.7721   28.2196   11.1756 N   0  0  0  0  0  0  0  0  0  0  0  0
   14.3852   31.0038   11.2129 C   0  0  0  0  0  0  0  0  0  0  0  0
   15.6076   30.3226   11.1975 C   0  0  0  0  0  0  0  0  0  0  0  0
   14.3665   32.3799   11.2205 C   0  0  0  0  0  0  0  0  0  0  0  0
   15.5612   33.0941   11.2129 C   0  0  0  0  0  0  0  0  0  0  0  0
   16.7792   32.4204   11.1976 C   0  0  0  0  0  0  0  0  0  0  0  0
   16.8066   31.0445   11.1899 C   0  0  0  0  0  0  0  0  0  0  0  0
   13.4236   32.9064   11.2278 H   0  0  0  0  0  0  0  0  0  0  0  0
   15.5379   34.4861   11.2202 N   0  0  0  0  0  0  0  0  0  0  0  0
   14.2572   35.1972   11.2358 C   0  0  0  0  0  0  0  0  0  0  0  0
   16.7942   35.2398   11.2122 C   0  0  0  0  0  0  0  0  0  0  0  0
   16.8643   22.7217   11.1472 O   0  0  0  0  0  0  0  0  0  0  0  0
   15.9838   22.0534   12.0528 C   0  0  0  0  0  0  0  0  0  0  0  0
   23.7901   50.7880   19.4173 C   0  0  0  0  0  0  0  0  0  0  0  0
   23.7716   51.2564   18.1119 C   0  0  0  0  0  0  0  0  0  0  0  0
   23.7744   50.3608   17.0528 C   0  0  0  0  0  0  0  0  0  0  0  0
   23.7951   49.0017   17.2972 C   0  0  0  0  0  0  0  0  0  0  0  0
   23.8136   48.5319   18.6038 C   0  0  0  0  0  0  0  0  0  0  0  0
   23.8055   49.4291   19.6636 C   0  0  0  0  0  0  0  0  0  0  0  0
   23.8542   46.6597   20.2310 C   0  0  0  0  0  0  0  0  0  0  0  0
   23.8347   47.1549   18.8524 N   0  0  0  0  0  0  0  0  0  0  0  0
   25.0823   44.4794   20.2086 C   0  0  0  0  0  0  0  0  0  0  0  0
   23.8746   45.1528   20.2233 C   0  0  0  0  0  0  0  0  0  0  0  0
   25.1047   43.0985   20.2014 C   0  0  0  0  0  0  0  0  0  0  0  0
   23.9122   42.3861   20.2090 C   0  0  0  0  0  0  0  0  0  0  0  0
   22.7007   43.0658   20.2184 C   0  0  0  0  0  0  0  0  0  0  0  0
   22.6857   44.4467   20.2304 C   0  0  0  0  0  0  0  0  0  0  0  0
   26.0482   42.5732   20.1896 H   0  0  0  0  0  0  0  0  0  0  0  0
   23.9311   40.9895   20.2013 N   0  0  0  0  0  0  0  0  0  0  0  0
   25.2096   40.2744   20.1853 C   0  0  0  0  0  0  0  0  0  0  0  0
   22.6725   40.2398   20.2093 C   0  0  0  0  0  0  0  0  0  0  0  0
   23.7503   52.5946   17.8703 O   0  0  0  0  0  0  0  0  0  0  0  0
   23.7487   53.4593   19.0080 C   0  0  0  0  0  0  0  0  0  0  0  0
  1  2  2  0      
  2  3  1  0      
  3  4  2  0      
  4  5  1  0      
  5  6  2  0      
  6  1  1  0      
  7  6  1  0      
  8  9  1  0      
  3  8  1  0      
 10 11  2  0      
 11 12  1  0      
 12 13  2  0      
 13 14  1  0      
 14 15  2  0      
 15 10  1  0      
 16 12  1  0      
 17 18  2  0      
 14 17  1  0      
 19 20  1  0      
 19 21  1  0      
 11 19  1  0      
 22 23  2  0      
 23 24  1  0      
 24 25  2  0      
 25 26  1  0      
 26 27  2  0      
 27 22  1  0      
 28 29  2  0      
 29 26  1  0      
 30 31  2  0      
 31 28  1  0      
 30 32  1  0      
 32 33  2  0      
 33 34  1  0      
 34 35  2  0      
 35 31  1  0      
 32 36  1  0      
 37 38  1  0      
 37 39  1  0      
 33 37  1  0      
 40 41  1  0      
 23 40  1  0      
 42 43  2  0      
 43 44  1  0      
 44 45  2  0      
 45 46  1  0      
 46 47  2  0      
 47 42  1  0      
 48 49  1  0      
 49 46  1  0      
 50 51  2  0      
 51 48  1  0      
 50 52  1  0      
 52 53  2  0      
 53 54  1  0      
 54 55  2  0      
 55 51  1  0      
 52 56  1  0      
 57 58  1  0      
 57 59  1  0      
 53 57  1  0      
 60 61  1  0      
 43 60  1  0      
M  STY  1   1 SUP
M  SLB  1   1   1
M  SAL   1  2   8   9
M  SBL   1  1   9
M  SMT   1 OCH3
M  SBV   1  9  -11.9000   25.4160
M  STY  1   2 SUP
M  SLB  1   2   2
M  SAL   2  2  17  18
M  SBL   2  1  18
M  SMT   2 CHO
M  SBV   2 18  -11.1855   26.6535
M  STY  1   3 SUP
M  SLB  1   3   3
M  SAL   3  3  19  20  21
M  SBL   3  1  21
M  SMT   3 N(CH3)2
M  SBV   3 21  -12.5997   25.8040
M  STY  1   4 SUP
M  SLB  1   4   4
M  SAL   4  3  37  38  39
M  SBL   4  1  40
M  SMT   4 N(CH3)2
M  SBV   4 40  -11.1855   26.6535
M  STY  1   5 SUP
M  SLB  1   5   5
M  SAL   5  2  40  41
M  SBL   5  1  42
M  SMT   5 OCH3
M  SBV   5 42  -12.6145   25.8285
M  STY  1   6 SUP
M  SLB  1   6   6
M  SAL   6  3  57  58  59
M  SBL   6  1  61
M  SMT   6 N(CH3)2
M  SBV   6 61  -11.1855   26.6535
M  STY  1   7 SUP
M  SLB  1   7   7
M  SAL   7  2  60  61
M  SBL   7  1  63
M  SMT   7 OCH3
M  SBV   7 63  -12.6145   25.8285
M  END
$$$$
