# Supplementary material
Source: MDPI journal article supplement (https://www.mdpi.com/search?q=molbank-2021-M1274)
Supplement: s003 [file molbank-2021-M1274-s003-mod.mol]

Structure2.mol
  corina  09102111543D 1   1.00000     0.00000 
CORINA 4.3.0 0026  30.10.2019
 55 57  0  0  0  0  0  0  0  0999 V2000
   -0.0126    1.0758    0.0080 C   0  0  0  0  0  0  0  0  0  0  0  0
   -1.2174    1.7508    0.0173 C   0  0  0  0  0  0  0  0  0  0  0  0
   -1.2370    3.1335    0.0308 C   0  0  0  0  0  0  0  0  0  0  0  0
   -0.0513    3.8450    0.0233 C   0  0  0  0  0  0  0  0  0  0  0  0
    1.1570    3.1764    0.0081 C   0  0  0  0  0  0  0  0  0  0  0  0
    1.1804    1.7875    0.0004 C   0  0  0  0  0  0  0  0  0  0  0  0
    2.4006    1.1080   -0.0145 N   0  0  0  0  0  0  0  0  0  0  0  0
   -2.1805    3.6588    0.0427 H   0  0  0  0  0  0  0  0  0  0  0  0
   10.0341   12.7723    5.0850 C   0  0  0  0  0  0  0  0  0  0  0  0
   11.2076   12.0298    5.0641 C   0  0  0  0  0  0  0  0  0  0  0  0
   11.1558   10.6355    5.0571 C   0  0  0  0  0  0  0  0  0  0  0  0
    9.9363    9.9899    5.0653 C   0  0  0  0  0  0  0  0  0  0  0  0
    8.7521   10.7379    5.0806 C   0  0  0  0  0  0  0  0  0  0  0  0
    8.8125   12.1363    5.0875 C   0  0  0  0  0  0  0  0  0  0  0  0
   12.3077    9.9126    5.0427 O   0  0  0  0  0  0  0  0  0  0  0  0
   12.4086   12.6625    5.0560 O   0  0  0  0  0  0  0  0  0  0  0  0
   12.3892   14.0914    5.0639 C   0  0  0  0  0  0  0  0  0  0  0  0
    7.4509   10.0569    5.0889 C   0  0  0  0  0  0  0  0  0  0  0  0
    7.4006    8.8450    5.0824 O   0  0  0  0  0  0  0  0  0  0  0  0
   22.5415   19.1183   12.2141 C   0  0  0  0  0  0  0  0  0  0  0  0
   22.2867   19.5678   10.9305 C   0  0  0  0  0  0  0  0  0  0  0  0
   21.4193   20.6253   10.7202 C   0  0  0  0  0  0  0  0  0  0  0  0
   20.8024   21.2388   11.7905 C   0  0  0  0  0  0  0  0  0  0  0  0
   21.0545   20.7900   13.0889 C   0  0  0  0  0  0  0  0  0  0  0  0
   21.9352   19.7256   13.2941 C   0  0  0  0  0  0  0  0  0  0  0  0
   19.9189   20.6687   15.1019 C   0  0  0  0  0  0  0  0  0  0  0  0
   20.4458   21.3940   14.1554 N   0  0  0  0  0  0  0  0  0  0  0  0
   18.6981   20.5413   17.2647 C   0  0  0  0  0  0  0  0  0  0  0  0
   19.2646   21.3179   16.2482 C   0  0  0  0  0  0  0  0  0  0  0  0
   18.0901   21.1567   18.3415 C   0  0  0  0  0  0  0  0  0  0  0  0
   18.0314   22.5479   18.4079 C   0  0  0  0  0  0  0  0  0  0  0  0
   18.5930   23.3192   17.3994 C   0  0  0  0  0  0  0  0  0  0  0  0
   19.2068   22.7135   16.3248 C   0  0  0  0  0  0  0  0  0  0  0  0
   17.5439   20.4051   19.3347 O   0  0  0  0  0  0  0  0  0  0  0  0
   22.7673   19.0914   10.0889 H   0  0  0  0  0  0  0  0  0  0  0  0
   17.4279   23.1507   19.4652 O   0  0  0  0  0  0  0  0  0  0  0  0
   17.4086   24.5796   19.4731 C   0  0  0  0  0  0  0  0  0  0  0  0
   29.0882   35.7363   25.4018 C   0  0  0  0  0  0  0  0  0  0  0  0
   28.6933   35.9529   26.7093 C   0  0  0  0  0  0  0  0  0  0  0  0
   29.4817   35.5098   27.7554 C   0  0  0  0  0  0  0  0  0  0  0  0
   30.6666   34.8490   27.4974 C   0  0  0  0  0  0  0  0  0  0  0  0
   31.0663   34.6298   26.1852 C   0  0  0  0  0  0  0  0  0  0  0  0
   30.2746   35.0809   25.1367 C   0  0  0  0  0  0  0  0  0  0  0  0
   32.6843   33.7320   24.5362 C   0  0  0  0  0  0  0  0  0  0  0  0
   32.2644   33.9624   25.9206 N   0  0  0  0  0  0  0  0  0  0  0  0
   34.0192   31.6157   24.5183 C   0  0  0  0  0  0  0  0  0  0  0  0
   34.0005   32.9980   24.5259 C   0  0  0  0  0  0  0  0  0  0  0  0
   35.2285   30.9394   24.5031 C   0  0  0  0  0  0  0  0  0  0  0  0
   36.4221   31.6545   24.4955 C   0  0  0  0  0  0  0  0  0  0  0  0
   36.3963   33.0399   24.5032 C   0  0  0  0  0  0  0  0  0  0  0  0
   35.1864   33.7085   24.5184 C   0  0  0  0  0  0  0  0  0  0  0  0
   35.2487   29.5796   24.4961 O   0  0  0  0  0  0  0  0  0  0  0  0
   27.7673   36.4696   26.9138 H   0  0  0  0  0  0  0  0  0  0  0  0
   37.6115   30.9952   24.4801 O   0  0  0  0  0  0  0  0  0  0  0  0
   38.7962   31.7943   24.4731 C   0  0  0  0  0  0  0  0  0  0  0  0
  1  2  2  0      
  2  3  1  0      
  3  4  2  0      
  4  5  1  0      
  5  6  2  0      
  6  1  1  0      
  7  6  1  0      
  3  8  1  0      
  9 10  2  0      
 10 11  1  0      
 11 12  2  0      
 12 13  1  0      
 13 14  2  0      
 14  9  1  0      
 15 11  1  0      
 16 17  1  0      
 10 16  1  0      
 18 19  2  0      
 13 18  1  0      
 20 21  2  0      
 21 22  1  0      
 22 23  2  0      
 23 24  1  0      
 24 25  2  0      
 25 20  1  0      
 26 27  2  0      
 27 24  1  0      
 28 29  2  0      
 29 26  1  0      
 28 30  1  0      
 30 31  2  0      
 31 32  1  0      
 32 33  2  0      
 33 29  1  0      
 30 34  1  0      
 21 35  1  0      
 36 37  1  0      
 31 36  1  0      
 38 39  2  0      
 39 40  1  0      
 40 41  2  0      
 41 42  1  0      
 42 43  2  0      
 43 38  1  0      
 44 45  1  0      
 45 42  1  0      
 46 47  2  0      
 47 44  1  0      
 46 48  1  0      
 48 49  2  0      
 49 50  1  0      
 50 51  2  0      
 51 47  1  0      
 48 52  1  0      
 39 53  1  0      
 54 55  1  0      
 49 54  1  0      
M  STY  1   1 SUP
M  SLB  1   1   1
M  SAL   1  2  16  17
M  SBL   1  1  17
M  SMT   1 OCH3
M  SBV   1 17  -12.9730   10.7577
M  STY  1   2 SUP
M  SLB  1   2   2
M  SAL   2  2  18  19
M  SBL   2  1  19
M  SMT   2 CHO
M  SBV   2 19  -11.5588   11.6073
M  STY  1   3 SUP
M  SLB  1   3   3
M  SAL   3  2  36  37
M  SBL   3  1  38
M  SMT   3 OCH3
M  SBV   3 38  -11.5588   11.6073
M  STY  1   4 SUP
M  SLB  1   4   4
M  SAL   4  2  54  55
M  SBL   4  1  57
M  SMT   4 OCH3
M  SBV   4 57  -11.5588   11.6073
M  END
$$$$
