# Supplementary material
Source: MDPI journal article supplement (https://www.mdpi.com/search?q=molbank-2021-M1274)
Supplement: s003 [file molbank-2021-M1274-s003.mol]

Structure2.mol
  ChemDraw09102110082D

 55 57  0  0  0  0  0  0  0  0999 V2000
  -10.0014    4.0448    0.0000 C   0  0  0  0  0  0  0  0  0  0  0  0
  -10.0014    3.2198    0.0000 C   0  0  0  0  0  0  0  0  0  0  0  0
   -9.2870    2.8073    0.0000 C   0  0  0  0  0  0  0  0  0  0  0  0
   -8.5725    3.2198    0.0000 C   0  0  0  0  0  0  0  0  0  0  0  0
   -8.5725    4.0448    0.0000 C   0  0  0  0  0  0  0  0  0  0  0  0
   -9.2870    4.4573    0.0000 C   0  0  0  0  0  0  0  0  0  0  0  0
   -9.2870    5.2823    0.0000 N   0  0  0  0  0  0  0  0  0  0  0  0
   -9.2870    1.9823    0.0000 H   0  0  0  0  0  0  0  0  0  0  0  0
   -5.6186    4.0018    0.0000 C   0  0  0  0  0  0  0  0  0  0  0  0
   -5.6186    3.1768    0.0000 C   0  0  0  0  0  0  0  0  0  0  0  0
   -4.9042    2.7643    0.0000 C   0  0  0  0  0  0  0  0  0  0  0  0
   -4.1897    3.1768    0.0000 C   0  0  0  0  0  0  0  0  0  0  0  0
   -4.1897    4.0018    0.0000 C   0  0  0  0  0  0  0  0  0  0  0  0
   -4.9042    4.4143    0.0000 C   0  0  0  0  0  0  0  0  0  0  0  0
   -4.9189    1.9649    0.0000 O   0  0  0  0  0  0  0  0  0  0  0  0
   -6.3183    2.7398    0.0000 O   0  0  0  0  0  0  0  0  0  0  0  0
   -6.2898    1.9181    0.0000 C   0  0  0  0  0  0  0  0  0  0  0  0
   -3.4752    4.4143    0.0000 C   0  0  0  0  0  0  0  0  0  0  0  0
   -2.7632    4.0033    0.0000 O   0  0  0  0  0  0  0  0  0  0  0  0
    4.2857    3.4003    0.0000 C   0  0  0  0  0  0  0  0  0  0  0  0
    4.2857    2.5753    0.0000 C   0  0  0  0  0  0  0  0  0  0  0  0
    5.0001    2.1628    0.0000 C   0  0  0  0  0  0  0  0  0  0  0  0
    5.7146    2.5753    0.0000 C   0  0  0  0  0  0  0  0  0  0  0  0
    5.7146    3.4003    0.0000 C   0  0  0  0  0  0  0  0  0  0  0  0
    5.0001    3.8128    0.0000 C   0  0  0  0  0  0  0  0  0  0  0  0
    7.1436    3.4003    0.0000 C   0  0  0  0  0  0  0  0  0  0  0  0
    6.4291    3.8128    0.0000 N   0  0  0  0  0  0  0  0  0  0  0  0
    8.5725    3.4003    0.0000 C   0  0  0  0  0  0  0  0  0  0  0  0
    7.8580    3.8128    0.0000 C   0  0  0  0  0  0  0  0  0  0  0  0
    9.2870    3.8128    0.0000 C   0  0  0  0  0  0  0  0  0  0  0  0
    9.2870    4.6378    0.0000 C   0  0  0  0  0  0  0  0  0  0  0  0
    8.5725    5.0503    0.0000 C   0  0  0  0  0  0  0  0  0  0  0  0
    7.8580    4.6378    0.0000 C   0  0  0  0  0  0  0  0  0  0  0  0
   10.0014    3.4003    0.0000 O   0  0  0  0  0  0  0  0  0  0  0  0
    3.5712    2.1628    0.0000 H   0  0  0  0  0  0  0  0  0  0  0  0
   10.0014    5.0503    0.0000 O   0  0  0  0  0  0  0  0  0  0  0  0
   10.0014    5.8724    0.0000 C   0  0  0  0  0  0  0  0  0  0  0  0
    4.1997   -4.6349    0.0000 C   0  0  0  0  0  0  0  0  0  0  0  0
    4.1997   -5.4599    0.0000 C   0  0  0  0  0  0  0  0  0  0  0  0
    4.9142   -5.8724    0.0000 C   0  0  0  0  0  0  0  0  0  0  0  0
    5.6287   -5.4599    0.0000 C   0  0  0  0  0  0  0  0  0  0  0  0
    5.6287   -4.6349    0.0000 C   0  0  0  0  0  0  0  0  0  0  0  0
    4.9142   -4.2224    0.0000 C   0  0  0  0  0  0  0  0  0  0  0  0
    7.0576   -4.6349    0.0000 C   0  0  0  0  0  0  0  0  0  0  0  0
    6.3431   -4.2224    0.0000 N   0  0  0  0  0  0  0  0  0  0  0  0
    8.4866   -4.6349    0.0000 C   0  0  0  0  0  0  0  0  0  0  0  0
    7.7721   -4.2224    0.0000 C   0  0  0  0  0  0  0  0  0  0  0  0
    9.2010   -4.2224    0.0000 C   0  0  0  0  0  0  0  0  0  0  0  0
    9.2010   -3.3974    0.0000 C   0  0  0  0  0  0  0  0  0  0  0  0
    8.4866   -2.9849    0.0000 C   0  0  0  0  0  0  0  0  0  0  0  0
    7.7721   -3.3974    0.0000 C   0  0  0  0  0  0  0  0  0  0  0  0
    9.9155   -4.6349    0.0000 O   0  0  0  0  0  0  0  0  0  0  0  0
    3.4853   -5.8724    0.0000 H   0  0  0  0  0  0  0  0  0  0  0  0
    9.9155   -2.9849    0.0000 O   0  0  0  0  0  0  0  0  0  0  0  0
    9.9155   -2.1628    0.0000 C   0  0  0  0  0  0  0  0  0  0  0  0
  1  2  2  0      
  2  3  1  0      
  3  4  2  0      
  4  5  1  0      
  5  6  2  0      
  6  1  1  0      
  7  6  1  0      
  3  8  1  0      
  9 10  2  0      
 10 11  1  0      
 11 12  2  0      
 12 13  1  0      
 13 14  2  0      
 14  9  1  0      
 15 11  1  0      
 16 17  1  0      
 10 16  1  0      
 18 19  2  0      
 13 18  1  0      
 20 21  2  0      
 21 22  1  0      
 22 23  2  0      
 23 24  1  0      
 24 25  2  0      
 25 20  1  0      
 26 27  2  0      
 27 24  1  0      
 28 29  2  0      
 29 26  1  0      
 28 30  1  0      
 30 31  2  0      
 31 32  1  0      
 32 33  2  0      
 33 29  1  0      
 30 34  1  0      
 21 35  1  0      
 36 37  1  0      
 31 36  1  0      
 38 39  2  0      
 39 40  1  0      
 40 41  2  0      
 41 42  1  0      
 42 43  2  0      
 43 38  1  0      
 44 45  1  0      
 45 42  1  0      
 46 47  2  0      
 47 44  1  0      
 46 48  1  0      
 48 49  2  0      
 49 50  1  0      
 50 51  2  0      
 51 47  1  0      
 48 52  1  0      
 39 53  1  0      
 54 55  1  0      
 49 54  1  0      
M  STY  1   1 SUP
M  SLB  1   1   1
M  SAL   1  2  16  17
M  SBL   1  1  17
M  SMT   1 OCH3
M  SBV   1 17  -12.9730   10.7577
M  STY  1   2 SUP
M  SLB  1   2   2
M  SAL   2  2  18  19
M  SBL   2  1  19
M  SMT   2 CHO
M  SBV   2 19  -11.5588   11.6073
M  STY  1   3 SUP
M  SLB  1   3   3
M  SAL   3  2  36  37
M  SBL   3  1  38
M  SMT   3 OCH3
M  SBV   3 38  -11.5588   11.6073
M  STY  1   4 SUP
M  SLB  1   4   4
M  SAL   4  2  54  55
M  SBL   4  1  57
M  SMT   4 OCH3
M  SBV   4 57  -11.5588   11.6073
M  END
